# Supplementary material for: Superior electrostrictive strain achieved under low electric fields in relaxor ferroelectric polymers
Source: Royal Society of Chemistry journal article supplement (doi:10.1039/c8ta11938d), 2019-01-01
Supplement: c8ta11938d4.pdf [file c8ta11938d4.pdf]

## Supplementary Information

### **Superior Electrostrictive Strain Achieved Under Low Electric Field in Relaxor Ferroelectric Polymers**

*Zhicheng Zhang\**, *Xiao Wang*, *Shaobo Tan*, and *Qing Wang\**

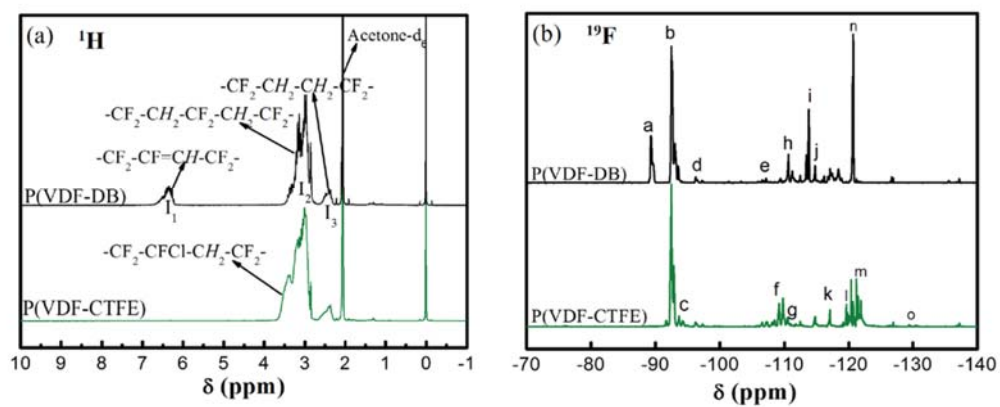

**Fig. S1.** a)  $^1\text{H}$  NMR of P(VDF-CTFE) bearing 20 mol% CTFE and P(VDF-DB) synthesized from the fully dehydrochlorination of P(VDF-CTFE). b)  $^{19}\text{F}$  NMR spectra of P(VDF-CTFE) with 20 mol% CTFE and P(VDF-DB) synthesized from the fully dehydrochlorination of P(VDF-CTFE).

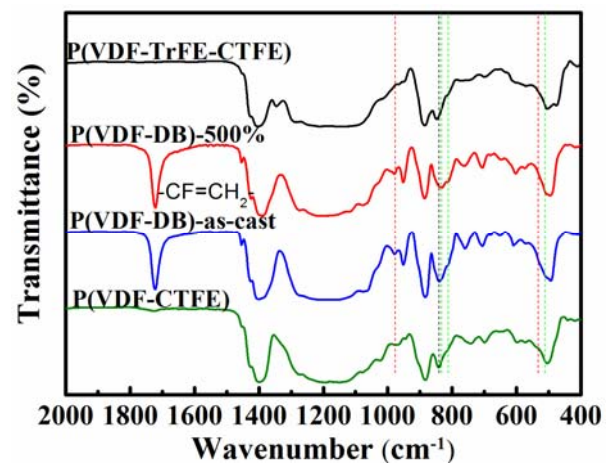

**Fig. S2.** FTIR spectra of P(VDF-TrFE-CTFE), P(VDF-DB)-500, P(VDF-DB)-as-cast and P(VDF-CTFE).

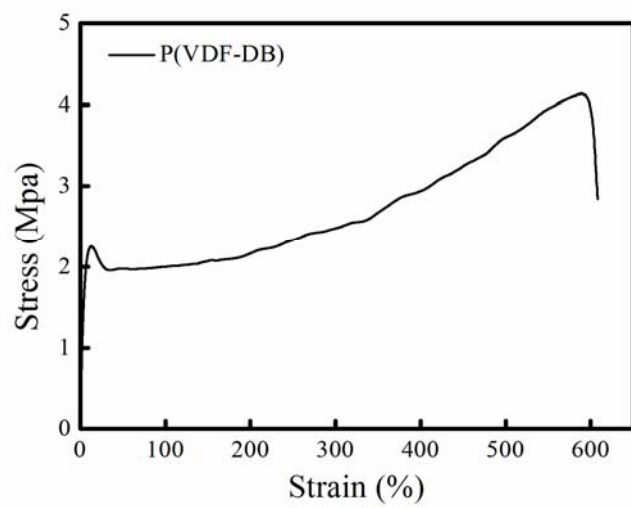

**Fig. S3.** Stress-strain curve of P(VDF-DB).

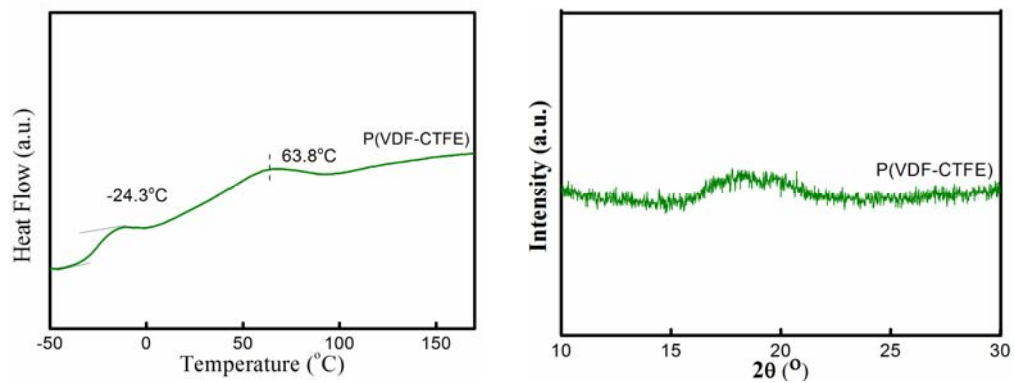

**Fig. S4.** DSC and XRD of P(VDF-CTFE).

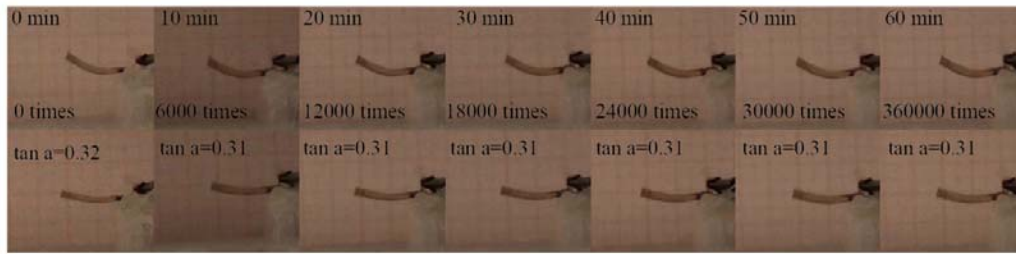

**Fig. S5.** The fatigue behavior of electrostrictive strain of P(VDF-DB)-500 with field.

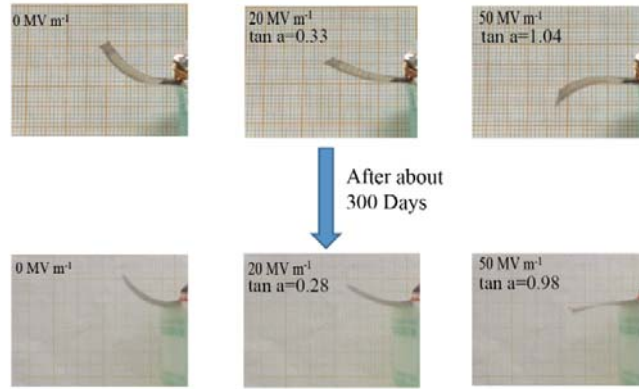

**Fig. S6** The fatigue behavior of electrostrictive strain of P(VDF-DB)-500 with time.

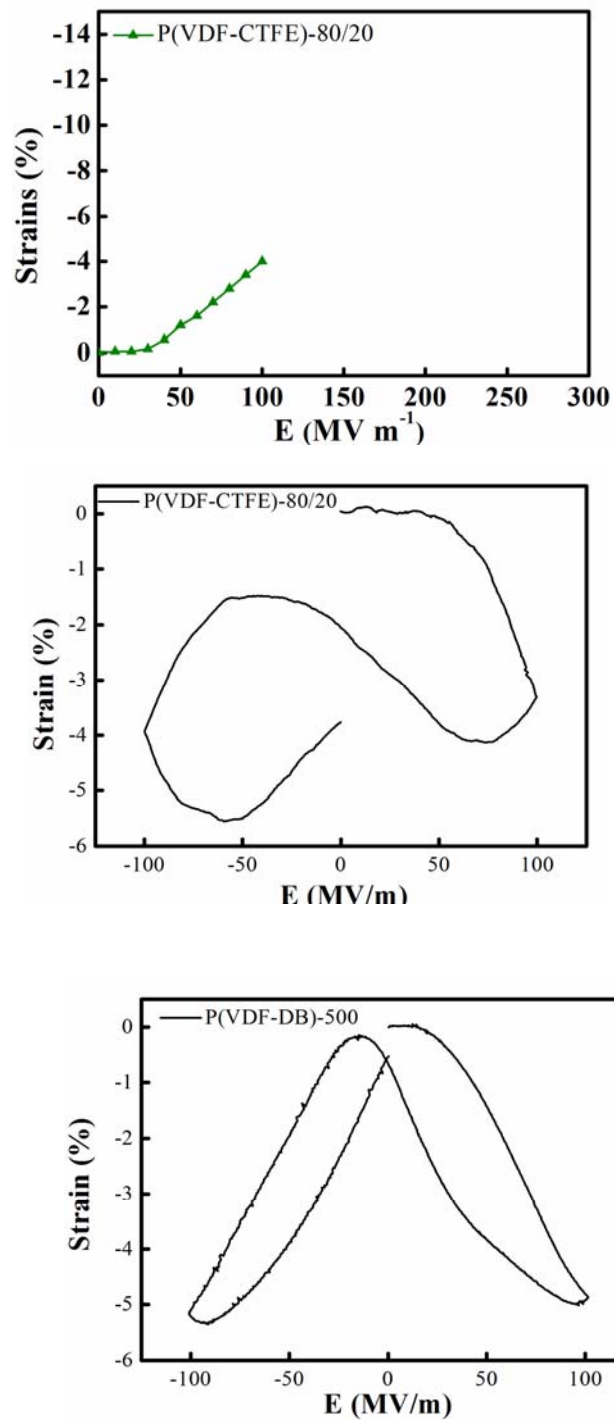

**Fig. S7.** Strain of P(VDF-CTFE) and P(VDF-DB)-500 under the applied field



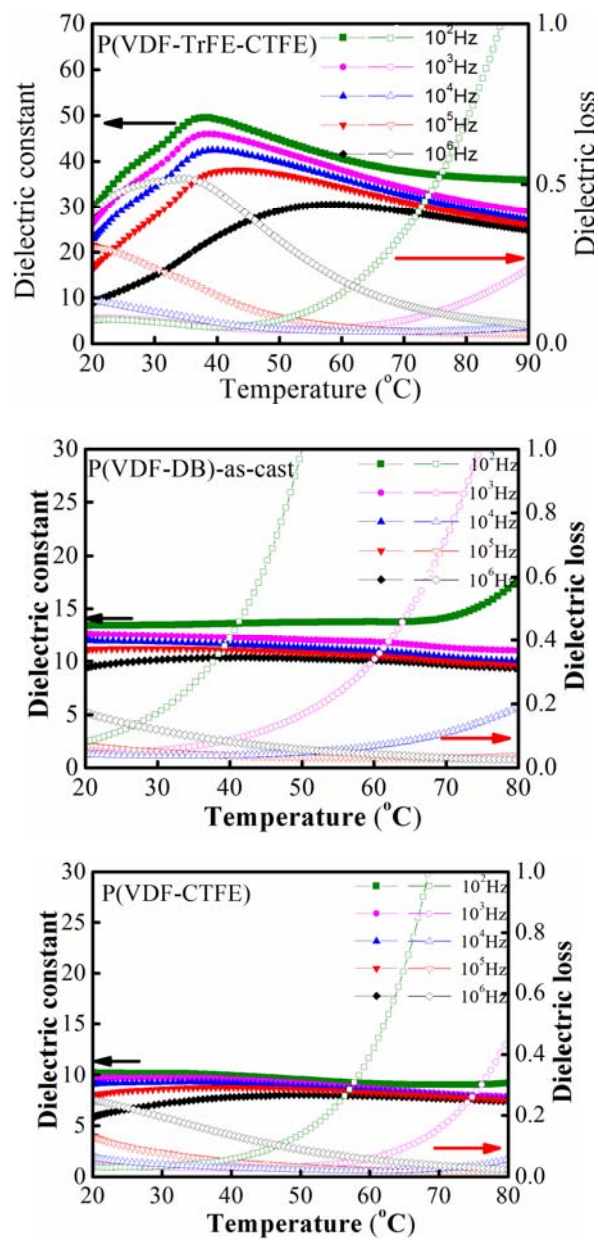

**Fig. S8.** Dielectric spectra of P(VDF-TrFE-CTFE), P(VDF-DB)-as-cast and P(VDF-CTFE).

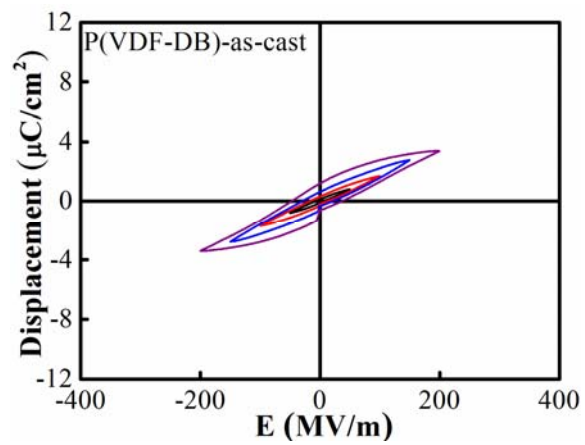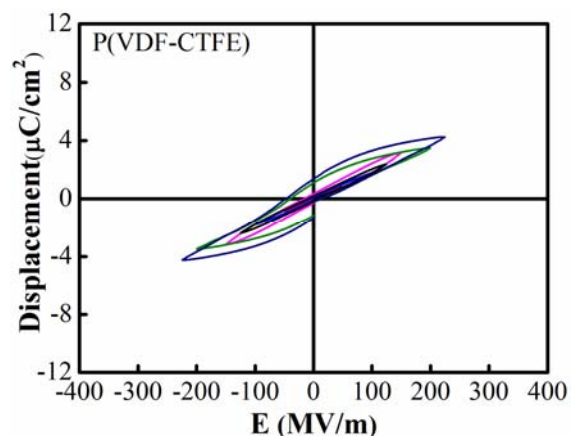

**Fig. S9.** D-E loops of P(VDF-DB)-as-cast and P(VDF-CTFE)

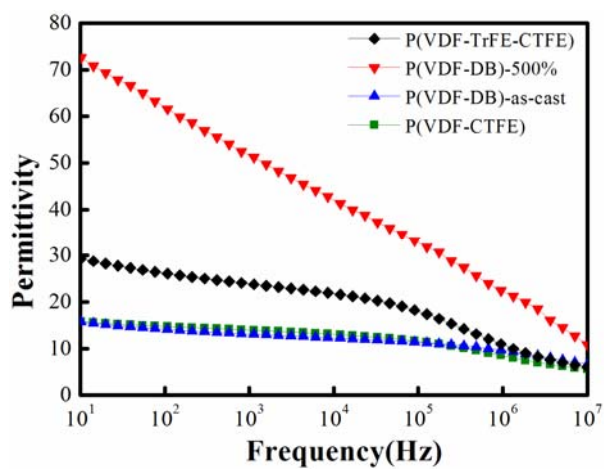

**Fig. S10** The frequency dependent permittivity of P(VDF-DB)-as-cast, P(VDF-CTFE), P(VDF-TrFE-CTFE) and P(VDF-DB)-500.

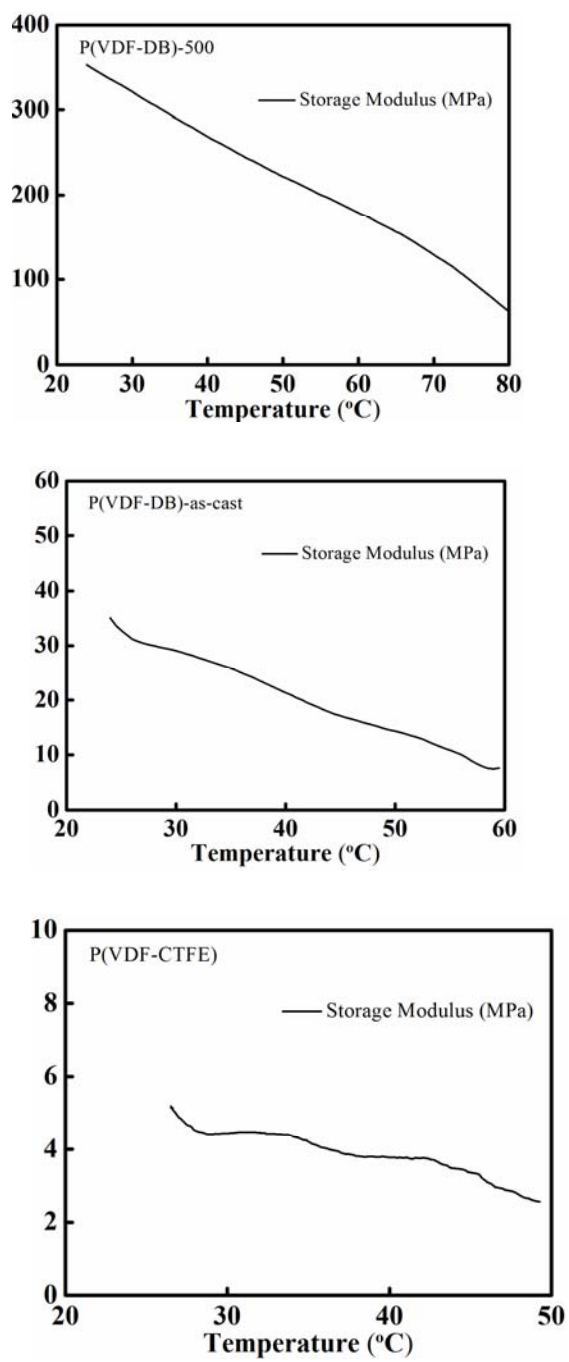

**Fig. S11.** DMA of P(VDF-CTFE)-500, P(VDF-DB)-as-cast and P(VDF-CTFE).

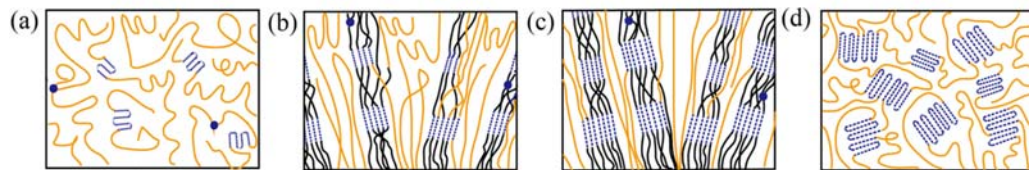

**Fig. S12.** Schematic of lamellae in crystalline and chains in a) P(VDF-DB)-as-cast. b) P(VDF-DB)-300. c) P(VDF-DB)-500 and d) P(VDF-TrFE-CTFE).

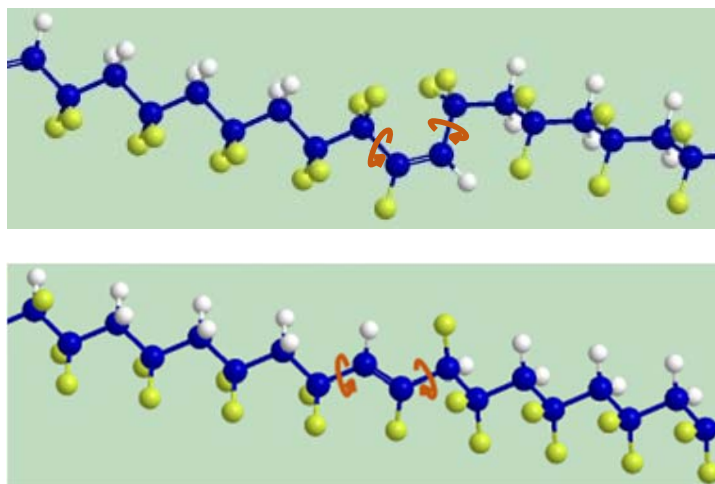

**Fig. S13.** Easily rotated  $\sigma$ -bonds in chains of *trans* formation of P(VDF-DB)-500 and *gauche* formation of P(VDF-DB)-500.

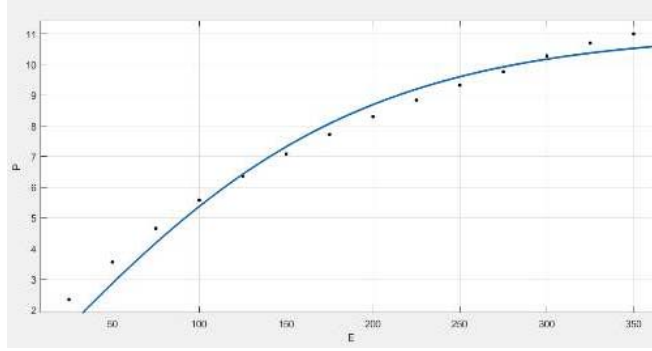

**Fig. S14.** The  $P_s$  and  $k$  are calculated from  $|P_E| = P_s \tanh(k|E|)$  by Matlab;  $f(x) = a \cdot (\exp(2 \cdot b \cdot x) - 1) / (\exp(2 \cdot b \cdot x) + 1)$ ,  $a = 11.05 \mu\text{C cm}^{-2}$ ,  $b = 0.5313 \cdot 10^{-8} \text{ m/V}$  ( $P_s$  is  $a$  and  $k$  is  $b$ ).

1 **Table S1.  $^{19}\text{F}$  NMR assignment of pristine P(VDF-CTFE) and resultant P(VDF-DB)**

| Peak | Sequence                                                                                                                        | Chemical Shift (ppm) |
|------|---------------------------------------------------------------------------------------------------------------------------------|----------------------|
| a    | -CF=CHCF <sub>2</sub> CH <sub>2</sub> CF <sub>2</sub> -                                                                         | -89.2                |
| b    | -CF <sub>2</sub> CH <sub>2</sub> CF <sub>2</sub> CH <sub>2</sub> CF <sub>2</sub> -                                              | -92.3                |
| c    | -CFCICH <sub>2</sub> CF <sub>2</sub> CH <sub>2</sub> CF <sub>2</sub> -                                                          | -93.16 to -93.67     |
| d    | -CH <sub>2</sub> CH <sub>2</sub> CF <sub>2</sub> CH <sub>2</sub> CF <sub>2</sub> -                                              | -94.26 to -97.31     |
| e    | -CF <sub>2</sub> CFCICF <sub>2</sub> CFCICF <sub>2</sub> -                                                                      | -106.5 to -107.82    |
| f    | -CF <sub>2</sub> CH <sub>2</sub> CF <sub>2</sub> CF <sub>2</sub> CFCI-                                                          | -108.0 to -109.34    |
| g    | -CF <sub>2</sub> CFCICF <sub>2</sub> CFCICH <sub>2</sub> -                                                                      | -109.34 to -113.10   |
| h    | -CF <sub>2</sub> CFCICF <sub>2</sub> CF=CH-                                                                                     | -110.1 to -111.6     |
| i    | -CF <sub>2</sub> CF <sub>2</sub> CF=CHCF <sub>2</sub> -,-CF <sub>2</sub> CH <sub>2</sub> CF <sub>2</sub> CF <sub>2</sub> CF=CH- | -113.4 to -113.7     |
| j    | -CF <sub>2</sub> CH <sub>2</sub> CF <sub>2</sub> CF <sub>2</sub> CH <sub>2</sub> -                                              | -114.7               |
| k    | -CH <sub>2</sub> CF <sub>2</sub> CF <sub>2</sub> CH <sub>2</sub> CH <sub>2</sub> -                                              | -116.6 to -118.8     |
| l    | -CH <sub>2</sub> CF <sub>2</sub> CF <sub>2</sub> CFCICH <sub>2</sub> -                                                          | -118.25 to -119.98   |
| m    | -CF <sub>2</sub> CF <sub>2</sub> CFCICH <sub>2</sub> CF <sub>2</sub> -                                                          | -120.35 to -123.32   |
| n    | -CH <sub>2</sub> CF <sub>2</sub> CF <sub>2</sub> CF=CH-                                                                         | -120.0 to -120.8     |
| o    | -CF <sub>2</sub> CH <sub>2</sub> CFCICF <sub>2</sub> CH <sub>2</sub> -                                                          | -129.46 to -130.53   |



**Table S2. The permittivity of the polymers measured at 20 °C**

| Polymer           | $\epsilon_r$<br>(0.01<br>HZ) | $\epsilon_r$<br>(0.1<br>HZ) | $\epsilon_r$<br>(1 HZ) | $\epsilon_r$<br>(10<br>HZ) | $\epsilon_r$<br>(10 <sup>2</sup><br>HZ) | $\epsilon_r$<br>(10 <sup>3</sup><br>HZ) | $\epsilon_r$<br>(10 <sup>4</sup><br>HZ) | $\epsilon_r$<br>(10 <sup>5</sup><br>HZ) | $\epsilon_r$<br>(10 <sup>6</sup><br>HZ) |
|-------------------|------------------------------|-----------------------------|------------------------|----------------------------|-----------------------------------------|-----------------------------------------|-----------------------------------------|-----------------------------------------|-----------------------------------------|
| P(VDF-TrFE-CTFE)  | 68.35                        | 44.60                       | 34.38                  | 29.21                      | 25.95                                   | 24.15                                   | 21.79                                   | 17.86                                   | 10.89                                   |
| P(VDF-DB)-500     | 656.4                        | 107.13                      | 81.23                  | 72.41                      | 61.95                                   | 51.61                                   | 42.06                                   | 32.73                                   | 21.81                                   |
| P(VDF-DB)-as-cast | 473.6                        | 33.82                       | 19.89                  | 15.73                      | 14.15                                   | 13.03                                   | 12.36                                   | 11.46                                   | 9.55                                    |
| P(VDF-CTFE)       | 231.8                        | 18.86                       | 13.14                  | 11.35                      | 10.78                                   | 9.94                                    | 9.33                                    | 8.09                                    | 6.51                                    |

**Table S3.** The electromechanical property of typical relaxor ferroelectric polymers

| <b>polymer</b> <sup>†</sup>                  | <b><math>S_{30}</math></b> <sup>†</sup> (%) | <b><math>S_{50}</math></b> <sup>†</sup> (%) | <b><math>S_M</math></b> (%) | <b><math>W_m</math></b> (J cm <sup>-3</sup> ) | <b><math>k_{33}</math></b> | <b>Ref</b> |
|----------------------------------------------|---------------------------------------------|---------------------------------------------|-----------------------------|-----------------------------------------------|----------------------------|------------|
| Irradiated-P(VDF-TrFE) <sup>†</sup><br>68/32 | -0.6                                        | -1.5                                        | -5                          | 0.5                                           | 0.3                        | 32         |
| P(VDF-TrFE-CTFE) <sup>†</sup><br>65/35/10    | -0.6                                        | -1.6                                        | -4                          | 0.32                                          | 0.28                       | 25         |
| P(VDF-TrFE-CFE) <sup>†</sup><br>68/32/4      | 0                                           | -0.5                                        | -4.5                        | 1.1                                           | 0.55                       | 17         |
| P(VDF-TrFE-CFE) <sup>†</sup><br>68/32/9      | -0.3                                        | -1.2                                        | -7                          | 0.73                                          | -                          | 12         |
| P(VDF-DB)-500 <sup>†</sup>                   | -1.3                                        | -2.5                                        | -13.4                       | 3.1                                           | 0.5                        | This work  |

<sup>†</sup> $S_{30}$  is the strain measured at 30 MV m<sup>-1</sup>.  $S_{50}$  is the strain measured at 50 MV m<sup>-1</sup>. Irradiated-P(VDF-TrFE), P(VDF-TrFE-CTFE) and P(VDF-TrFE-CFE) are measured at 1 Hz. P(VDF-DB)-500 is measured at 10 Hz.
